# Supplementary material
Source: PubMed Central journal article supplement (PMC6504561)
Supplement: NIHMS1002951-supplement-Supplemental_Information.pdf [file NIHMS1002951-supplement-Supplemental_Information.pdf]

**A**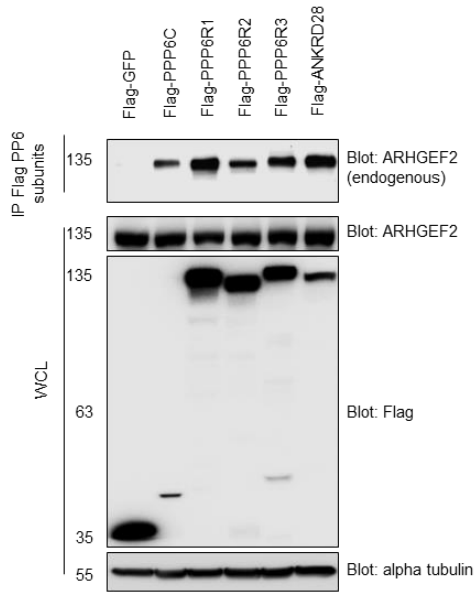**B**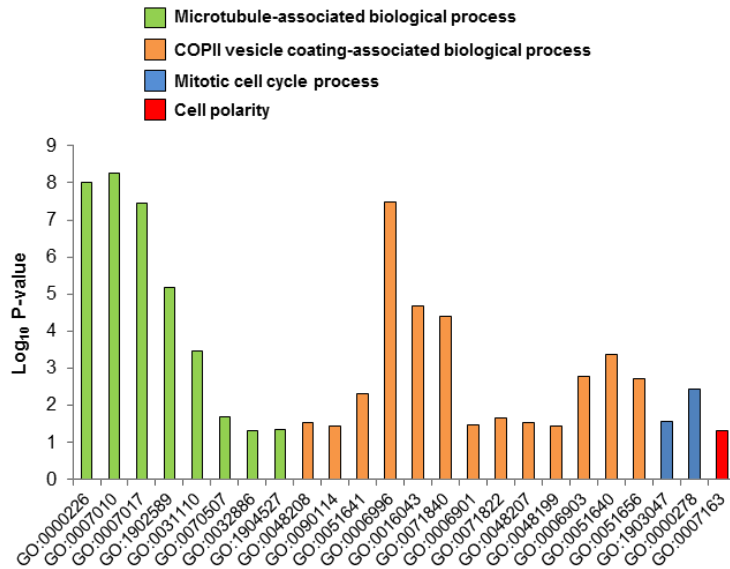**Figure S1. ARHGEF2 interaction network.**

(A) Validation of a subset of ARHGEF2 interactors. Tetracycline-inducible Flag-tagged PP6 regulatory subunits were immunoprecipitated with an antibody specific for Flag covalently attached to agarose beads and protein complexes were probed for the presence of endogenous ARHGEF2. Specific antibodies for ARHGEF2 and Flag were used to detect protein abundance in cell lysates.  $\alpha$ -tubulin was used as a loading control. Representative of two independent experiments. (B) Gene ontology (GO) enrichment analysis of the ARHGEF2 interaction network (<http://www.geneontology.org/>), based on biological process. See **Table S2** for more details.

Unconserved 0 1 2 3 4 5 6 7 8 9 10 Conserved

|                 |             |            |            |            |            |
|-----------------|-------------|------------|------------|------------|------------|
|                 | 10          | 20         | 30         | 40         | 50         |
| Q92974_Homo_sap | -----       | -----      | -----      | MSRI-E     | SLTRARIDRS |
| Q60875_Mus_musc | -----       | -----      | -----      | MSRI-E     | SLTRARIDRS |
| Q86583_Canis_lu | -----       | -----      | -----      | MSRI-E     | SLTRARTERS |
| Q5FVC2_Rattus_n | -----       | -----      | -----      | MSRI-E     | SLTRARIDRS |
| F1N1F7_Bos_taur | -----       | -----      | -----      | MSRI-E     | SLTRARIDRS |
| Q6AX47_Xenopus  | -----       | -----      | -----      | MSWK-G     | RRPSERVPAG |
| Q6NY14_Xenopus  | -----       | -----      | -----      | MSRI-E     | SFGKAPAERT |
| H3AF10_Latimeri | MRLLLHDNKPV | RSFSSLFSL  | RREEKKYSKE | RGEKMSRV-E | VLAKARNERI |
| B2DCZ9_Sus_scro | -----       | -----      | -----      | -----      | -----      |
| W5UTH7_Ictaluru | -----       | -----      | -----      | MSRV-T     | DVSKVRQERM |
| E7F4U1_Danio_re | -----       | -----      | -----      | MSRASE     | PLPKARQERM |
| K7FEF2_Pelodisc | -----       | -----      | -----      | -----      | -----      |
| Consistency     | 0000000000  | 0000000000 | 0000000000 | 0000665404 | 3434552453 |

|                 |            |            |            |            |            |
|-----------------|------------|------------|------------|------------|------------|
|                 | 60         | 70         | 80         | 90         | 100        |
| Q92974_Homo_sap | RELASKTREK | EKMKE      | AKDARYTNG  | HLFTTISVSG | MTMCIACNKS |
| Q60875_Mus_musc | KEQATKTREK | EKMKE      | AKDARYTNG  | HLFTTISVSG | MTMCIACNKS |
| Q86583_Canis_lu | RELASKNREK | EKMKE      | AKDARYTNG  | HLFTTISVSG | MTMCIACNKS |
| Q5FVC2_Rattus_n | KEQATKTREK | EKMKE      | AKDARYTNG  | HLFTTISVSG | MTMCIACNKS |
| F1N1F7_Bos_taur | RELASKTREK | EKMKE      | AKDARYTNG  | HLFTTISVSG | MTMCIACNKS |
| Q6AX47_Xenopus  | QNK--EKEK  | MKDSK      | EKDPRTYNG  | HLFTTITVSG | TTCFVCNKS  |
| Q6NY14_Xenopus  | KNK--EKEK  | MKD        | SKDPRTYNG  | HLFTTITVSG | TTCFVCNKS  |
| H3AF10_Latimeri | REIAIKNREK | EKMKE      | REKEA      | KEKEARYTNG | HLFNSITVSG |
| B2DCZ9_Sus_scro | -----      | --MKE      | AKDARYTNG  | HLFTTISVSG | MTMCIACNKS |
| W5UTH7_Ictaluru | REITLRNKEK | ERMRE      | REERA      | REREARYTNG | HLFTSLTVSG |
| E7F4U1_Danio_re | KDNNAKNKEK | ERMKA      | REKET      | KERESRYSNG | HLFTSLSVSA |
| K7FEF2_Pelodisc | -----      | -----      | -----      | -----      | -----      |
| Consistency     | 5522233566 | 4655500000 | 0576688788 | 8887676887 | 5868568888 |

|                 |            |            |            |            |            |
|-----------------|------------|------------|------------|------------|------------|
|                 | 110        | 120        | 130        | 140        | 150        |
| Q92974_Homo_sap | ITAKEALICP | TCNVTIHNRC | KDTLANCTKV | KQKQKKAALL | KNNTA-LQSV |
| Q60875_Mus_musc | ITAKEALICP | TCNVTIHNRC | KDTLANCTKV | KQKQKKAALL | RNNTA-LQSV |
| Q86583_Canis_lu | ITAKEALICP | TCNVTIHNRC | KDTLANCTKV | KQKQKKAALL | KNSTA-LQSV |
| Q5FVC2_Rattus_n | ITAKEALICP | TCNVTIHNRC | KDTLANCTKV | KQKQKKAALL | RNNTA-LQSV |
| F1N1F7_Bos_taur | ITAKEALICP | TCNVTIHNRC | KDTLANCTKV | KQKQKKAALL | KNNTA-LQSV |
| Q6AX47_Xenopus  | ITAKEALICP | TCSVSIHNRC | KDALPSCTKV | KQKQKTAFL  | KNNSA-LQNV |
| Q6NY14_Xenopus  | ITAKEALICP | TCNVTIHNRC | KDALPSCTKV | KQKQKKAALF | KNNSA-LQNV |
| H3AF10_Latimeri | ITAKEALICP | TCNVTIHNRC | KDTLANCTKV | KQKQKKAALV | KNNSA-LQTV |
| B2DCZ9_Sus_scro | ITAKEALICP | TCNVTIHNRC | KDTLANCTKV | KQKQKKAALL | KNNTA-LQSV |
| W5UTH7_Ictaluru | ITAKEALS   | TCNVTIHNRC | RDSLPNCAKM | KQRQKRLALM | RNSSYS     |
| E7F4U1_Danio_re | ITAKEALS   | TCNVTIHNRC | RDTLANCAKM | KQKQKRLALG | RNTAT-LHNV |
| K7FEF2_Pelodisc | -----P     | ACNVTIHNRC | KDTLPNCTKV | KQKQKKAALL | KNNSA-LQSV |
| Consistency     | 888888868* | 9*9*9***   | 8*7*68*8*8 | *9*9*97*87 | 8*7780877* |

|                 |            |            |                 |            |                |
|-----------------|------------|------------|-----------------|------------|----------------|
|                 | 160        | 170        | 180             | 190        | 200            |
| Q92974_Homo_sap | SLRSK-TTIR | ERPSSAIYPS | DSFRQSLG        | RRGRSSL    | SLA KSVSTTNIAG |
| Q60875_Mus_musc | SLRSK-TTTR | ERPTS      | AIYPS DSFRQSLG  | RRGLSSL    | SLA KSVSTTNIAG |
| Q86583_Canis_lu | SLRSK-TTPR | ERPSS      | AIYPS DSFRQSLG  | RRGRSSL    | SLA KSVSTTNIAG |
| Q5FVC2_Rattus_n | SLRSK-TTTR | ERPTS      | AIYPS DSFRQSLG  | RRGLSSL    | SLA KSVSTTNIAG |
| F1N1F7_Bos_taur | SLRSK-TTTR | ERPSS      | AIYPS DI-RQSLG  | RRGRSSL    | SLA KSVSTTNIAG |
| Q6AX47_Xenopus  | SLRNKSTTLR | ERPNS      | AIYPS DSLRHSILG | RRGRSSL    | SLA KSVSTTNIAG |
| Q6NY14_Xenopus  | SLRNKSTTLR | ERPNS      | AIYPS DSLRHSILG | RRGRSSL    | SLA KSVSTTNIAG |
| H3AF10_Latimeri | ALRNKSTLIK | DRPSS      | AVYLS DSFRQSLG  | RRGRSSL    | SLA KSVSTTNIAG |
| B2DCZ9_Sus_scro | SLRSK-TTTR | ERPSS      | AIYPS DSFRQSLG  | RRGRSSL    | SLA KSVSTTNIAG |
| W5UTH7_Ictaluru | TLRNK-THLK | ERPSS      | AIYPS DSLRQSLG  | RRGRSSL    | SLA KSVSTTNIAG |
| E7F4U1_Danio_re | ALRSKNEILK | ERPSS      | AIYPS ETLRQSLG  | RRGRSSL    | SLN KSVSTTNIAG |
| K7FEF2_Pelodisc | SLRNK-TATR | ERPNS      | AIYPS ESFRQTLG  | RRGRSSL    | SLA KSVSTTNIAG |
| Consistency     | 8*7*08658  | 9*7*9*8*   | 885*898**       | *9*77798*7 | ***8***        |

|                 |            |            |            |            |            |
|-----------------|------------|------------|------------|------------|------------|
|                 | 210        | 220        | 230        | 240        | 250        |
| Q92974_Homo_sap | HFNDESPLGL | RRILSQSTDS | LNMRNRTLSV | ESLIDEA-EV | IYSELMSDFE |
| Q60875_Mus_musc | HFNDESPLGL | RQILSQSTDS | LNMRNRTLSV | ESLIDEGEV  | FYNELMSDFE |
| Q86583_Canis_lu | HFSDESPLGL | RRILSQSTDS | LNMRNRALSV | ESLIDEGAEV | IYSELMSDFE |
| Q5FVC2_Rattus_n | HFNDESPLGL | RQILSQSTDS | LNMRNRTLSV | ESLIDEGEV  | FYNELMSDFE |

|                 |            |            |             |            |            |
|-----------------|------------|------------|-------------|------------|------------|
| F1N1F7_Bos_taur | HFNDESPLGL | RRILSQSTDS | LNMRNRTLSV  | ESLIDEGAEV | IYNELMSDFE |
| Q6AX47_Xenopus  | NLNDESPLGI | RRILSQSTDS | LNMRNRTLSV  | ESLIDEGAEV | VYSQLMSDFA |
| Q6NY14_Xenopus  | NLNDESPLGI | RRILSQSTDS | LNMRNRTLSV  | ESLIDEGAEV | VYSQLMSDFA |
| H3AF10_Latimeri | NWNDDSPGLL | RRILSQSTDS | LNKIKNRTLSV | ESLIDEGAEV | IYNQLMGNLE |
| B2DCZ9_Sus_scro | HFNDESPLGL | RRILSQSTDS | LNMRNRTLSV  | ESLIDEGAEV | IYNELMSDFE |
| W5UTH7_Ictaluru | TLSDDSPLGL | RRILSQSTDS | LNFRSRTMSM  | ESLNDEG-EV | YYASVLEELE |
| E7F4U1_Danio_re | SLNDDSPIGL | RRILSHSTDS | LNFRNRAMSM  | ESLNDEG-ET | YYSMMEELE  |
| K7FEF2_Pelodisc | NFKHESPLGL | RRILSQSTDS | LNMRNRTLSV  | ESLIDEGAEF | VYSQLMSDFE |
| Consistency     | 56788**9*9 | *8***8**** | **799*89*8  | ***7**94*8 | 6*67897878 |

|                 |             |            |            |            |            |
|-----------------|-------------|------------|------------|------------|------------|
| Q92974_Homo_sap | MDEKDFEAADS | WSLAVDSSFL | QQHKKEVMKQ | QDVIYELIQT | ELHHVRTLKI |
| Q60875_Mus_musc | MDEKDFEADS  | WSLAVDSSFL | QQHKKEVMKQ | QDVIYELIQT | ELHHVRTLKI |
| Q865S3_Canis_lu | TDERDFAADS  | WSLAVDSSFL | QQQKKEVMKQ | QDVIYELIQT | ELHHVRTLKI |
| Q5FVC2_Rattus_n | MDEKDFEADS  | WSLAVDSSFL | QQHKKEVMKQ | QDVIYELIQT | ELHHVRTLKI |
| F1N1F7_Bos_taur | MDEKDFEADS  | WSLAVDSSFL | QQHKKEVMKQ | QDVIYELIQT | ELHHVRTLKI |
| Q6AX47_Xenopus  | TEEKEFEADS  | WSLAVDNNYL | QQHKKDVMKR | QDVIYELIQT | EVHHVRTLKI |
| Q6NY14_Xenopus  | TEEKEFEADS  | WSLAVDNNYL | QQHKKDVMKR | QDVIYELIQT | EVHHVRTLKI |
| H3AF10_Latimeri | TDEKDFEADS  | WSLAVDTNFL | QQHRKDIKR  | QDVIYELIQT | ELHHVRTLKI |
| B2DCZ9_Sus_scro | MGEKDFEAADS | WSLAVDSSFL | QQHKKEVMKQ | QDVIYELIQT | ELHHVRTLKI |
| W5UTH7_Ictaluru | IEGRDFEADS  | WSMVVDSAYL | QTHRKDIKR  | QDVIYELIQT | ELHHVRTLRI |
| E7F4U1_Danio_re | RDEKDFEAADS | WSLAVDSSYL | QSQRKDVIKR | QDVIYELIQT | EFNHVRTLRI |
| K7FEF2_Pelodisc | TDEKDFEADS  | WSLAVDNNYL | QQHKKEVMKR | QDVIYELIQT | ELHHVRTLKI |
| Consistency     | 57788*6***  | **99**778* | *888*898*7 | *****      | *89*****8* |

|                 |             |            |            |            |             |
|-----------------|-------------|------------|------------|------------|-------------|
| Q92974_Homo_sap | MTRLFRFTGML | EELHLEPGVV | QGLFPCVDEL | SDIHTRFLSQ | LLERRRQALC  |
| Q60875_Mus_musc | MTRLFRFTGML | EELQMEPEVV | QGLFPCVDEL | SDIHTRFLNQ | LLERRRQALC  |
| Q865S3_Canis_lu | MTRLFRFTGML | EELQLEPGVV | QGLFPCVDEL | SDIHTRFLSQ | LLERRRQALC  |
| Q5FVC2_Rattus_n | MTRLFRFTGML | EELQMEPEVV | QGLFPCVDEL | SDIHTRFLSQ | LLERRRQALC  |
| F1N1F7_Bos_taur | MTRLFRFTGML | EELQLEPGVV | QGLFPCVDEL | TDIHTRFLSQ | LLDRRRQALC  |
| Q6AX47_Xenopus  | MTNIFRKGML  | EDLQMDPALV | NKMFPCVDEL | SDIHTRFLSQ | LLERRRQALC  |
| Q6NY14_Xenopus  | MTNIFRKGML  | EDLQMDPALV | NKMFPCVDEL | SDIHTRFLSQ | LLERRRQALC  |
| H3AF10_Latimeri | MSDIFRKGML  | EDLSMDQTLV | HSMFPVLDEL | SDLHVRFLSQ | LLERRRQALC  |
| B2DCZ9_Sus_scro | MTRLFRFTGML | EELQLEPGVV | QGLFPCVDEL | SDIHTRFLSQ | LLERRRQALC  |
| W5UTH7_Ictaluru | MDGVFRRGML  | DEVQLEPGVV | HALFPCLEKL | LVLHTRFLSQ | LLNRRRLHCLQ |
| E7F4U1_Danio_re | MEGVIFRRGML | EEVMMEMGVV | HAIFFCLDLO | LLIHTRFLSQ | LLQRRSNSLA  |
| K7FEF2_Pelodisc | MTNIFRKGML  | EDLQMDPALV | QSMFPCVDEL | SDVHTRFLSQ | LLVGSKESLA  |
| Consistency     | *757*95***  | 988788758* | 658**8898* | 779*69**6* | **688667*5  |

|                 |             |             |            |            |            |
|-----------------|-------------|-------------|------------|------------|------------|
| Q92974_Homo_sap | PGSTRNFVVIH | RLGDL---LI  | SQFSGPSAEQ | MCKTYSEFCS | RHSKALKLYK |
| Q60875_Mus_musc | PGSTRNFVVIH | RLGDL---LI  | SQFSGSNAEQ | MRKTYSEFCS | RHTKALKLYK |
| Q865S3_Canis_lu | PGSTRNFVVIH | RLADL---LI  | SQFSGPSAER | MRKAYSEFCS | RHTKALKLYK |
| Q5FVC2_Rattus_n | PGSTRNFVVIH | RLGDL---LI  | SQFSGSNAEQ | MRKTYSEFCS | RHTKALKLYK |
| F1N1F7_Bos_taur | PGSTRNFVVIH | RLGDL---LI  | SQFSGPSAEQ | MRKTYSEFCS | RHTKALKLYK |
| Q6AX47_Xenopus  | SDSNKNFVIN  | KLGD I---LI | NQFSGTNGER | LKKTYTEFAS | QHHKAMKLYK |
| Q6NY14_Xenopus  | SDSNKNFVIN  | KLGD I---LI | NQFSGTNAER | MKKAYTEFAS | QHHKAMKLYK |
| H3AF10_Latimeri | SNSNKNFVIN  | RLGD I---LV | TQFSGTNAEQ | MKKAYKEFCS | RHTKAVKLYK |
| B2DCZ9_Sus_scro | PGSTRNFVVIH | RLGDL---LI  | TQFSGPSADQ | MRKTYSEFCS | RHTKALKLYK |
| W5UTH7_Ictaluru | PDS THNFTIS | RISDL---LM  | QQFSGQCADE | MKKTAYEFCS | GHLKAVKLYK |
| E7F4U1_Danio_re | SNSNRNFTIQ  | KLGD I---LV | EQFSGQNAED | MRKCYVEFCS | RHLKAVKLYK |
| K7FEF2_Pelodisc | NGRNKNIVRH  | REGAATSGIG  | AQFSGHSAEQ | MKKAYAEFCS | RHTKAVKLYK |
| Consistency     | 56867*9886  | 888970097   | 5***46986  | 96*6*6**8* | 7*5**7***  |

|                 |             |            |            |            |            |
|-----------------|-------------|------------|------------|------------|------------|
| Q92974_Homo_sap | ELYARDKRFQ  | QFIRKVTSPA | VLKRRHGVEQ | ILLVTQRITK | YPLISRILQ  |
| Q60875_Mus_musc | ELYARDKRFQ  | QFIRKMTRSA | VLKRRHGVEQ | ILLVTQRITK | YPVLINRILQ |
| Q865S3_Canis_lu | ELYARDKRFQ  | QFIRKVTSPA | VLKRRHGVEQ | ILLVTQRITK | YPVLINRILQ |
| Q5FVC2_Rattus_n | ELYARDKRFQ  | QFIRKMTRSA | VLKRRHGVEQ | ILLVTQRITK | YPVLINRILQ |
| F1N1F7_Bos_taur | ELYARDKRFQ  | QFIRKVTSPA | VLKRRHGVEQ | ILLVTQRITK | YPVLINRILQ |
| Q6AX47_Xenopus  | ELFSRDKKFQ  | QMIRKMTRSP | LLRRHGVEQ  | ILLVTQRITK | YPVLDIRILQ |
| Q6NY14_Xenopus  | ELFSRDKKFQ  | QMIRKMTRSP | LLRRHGVEQ  | ILLVTQRITK | YPVLDIRILQ |
| H3AF10_Latimeri | ELFTRDKRFQ  | QFIRRMTRST | VLRRHGVEQ  | ILLVTQRITK | YPVLDIRILQ |
| B2DCZ9_Sus_scro | ELYARDKRFQ  | QFIRKVTSPA | VLKRRHGVEQ | ILLVTQRITK | YPLISRILQ  |
| W5UTH7_Ictaluru | ELLARDKRLQ  | YFIRKVSRRP | LLRRHGVEQ  | ILLVTQRITK | YPVLVQRILD |
| E7F4U1_Danio_re | ELLDARDKRFQ | QFIRRVSRGS | LLRRHGVEQ  | ILLVTQRITK | YPVLMQRILD |
| K7FEF2_Pelodisc | ELFARDKRFQ  | QFIRRLTRSS | VLRRHGVEQ  | ILLVTQRITK | YPVLDIRILQ |
| Consistency     | **68**89*   | 88**878*75 | 8*8**8***  | *****9**   | **9*85***8 |

|                 |             |            |            |            |            |
|-----------------|-------------|------------|------------|------------|------------|
| Q92974_Homo_sap | HSHGTEEEERQ | DLTTALGLVK | ELLSNVDEGI | YQLEKGARLQ | EIYNRMDPRA |
| Q60875_Mus_musc | NSHGVEEEYQ  | DLASALGLVK | ELLSNVDDQV | HELEKEARLQ | EIYNRMDPRA |
| Q865S3_Canis_lu | HSHGTEEEERQ | DLTTALGLVK | ELLSNVDDQV | HELEKGARLQ | EIYHRMDPRA |
| Q5FVC2_Rattus_n | NSHGTEEEYQ  | DIAAALGLVK | ELLSNVDDQV | HELEKEARLQ | EIYNRMDPRA |

|                 |            |             |            |            |            |
|-----------------|------------|-------------|------------|------------|------------|
| F1N1F7_Bos_taur | HSHGMEEERQ | DLTKALGLVK  | ELLSNVDQDV | HELEKGARLQ | EIYNRMDPRA |
| Q6AX47_Xenopus  | NSKGDEEEHQ | DLAESLRLLK  | DLISTIDQDV | HNLEKNLRLQ | EIYQRIDSKS |
| Q6NY14_Xenopus  | NSKGDEEEYL | DLAESLRMVK  | ELITTIQDV  | HNLEKSLRLQ | EIYQRIDSKS |
| H3AF10_Latimeri | NTKGNEEDSR | DLAQUALSLIK | DLIFTVDQEV | FECEKSLRLQ | EIYNRVDSKA |
| B2DCZ9_Sus_scro | HTHGIEEERQ | DLTTALGLVK  | ELLSNVDQDV | HELEKGARLQ | EIYNRMDPRA |
| W5UTH7_Ictaluru | NTKDNPEEEV | GLKQALTLR   | DLLNGVEQV  | LELERTQLRQ | EIRSRLDPRS |
| E7F4U1_Danio_re | NTKGNEEESK | SLAQSLTLR   | ELLCSVDQV  | QELERAQRLQ | EIQSRLDPR  |
| K7FEF2_Pelodisc | NSKGNVEVDR | DLGMALTLVK  | DLISAIDLEV | HEQEKSARLQ | EIYGRVDGRV |
| Consistency     | 7868488846 | 8*548*4988  | 8*86599869 | 677*845*** | **75*7*687 |

|                 |            |            |            |            |            |     |
|-----------------|------------|------------|------------|------------|------------|-----|
|                 |            | 510        | 520        | 530        | 540        | 550 |
| Q92974_Homo_sap | QTPV---PGK | GPFGREELLR | RKLIHDGCLL | WKTATG-RFK | DVLVLLMTDV |     |
| Q60875_Mus_musc | QTPV---PGK | GPFGRDELLR | RKLIHEGCLL | WKTATG-RFK | DVLVLLMTDV |     |
| Q86583_Canis_lu | QAPV---PSK | GPFGREELLR | RKLIHDGCLL | WKTATG-RFK | DVLVLLMTDV |     |
| Q5FVC2_Rattus_n | QTPV---PGK | GPFGRDELLR | RKLIHDGCLL | WKTATG-RFK | DVLVLLMTDV |     |
| F1N1F7_Bos_taur | QAPV---PGK | GPFGREELLR | RKLIHDGCLL | WKTATG-RFK | DVLVLLMTDV |     |
| Q6AX47_Xenopus  | V-AL---VGG | DPSFKEELLR | RKLIHEGSLL | WKTAAQ-RFK | DVIMLLMTDT |     |
| Q6NY14_Xenopus  | VALV---DGD | HSPFKEELLR | RKLIHEGSLL | WKTAAQ-RFK | DVIMLLMTDT |     |
| H3AF10_Latimeri | VGVV---HGG | LFRKEEFQR  | RKLIHDGFML | WKNSSG-RFK | DVQVLLMTDV |     |
| B2DCZ9_Sus_scro | QTPV---PGK | GPFGREELLR | RKLIHDGCLL | WKTAAQ-RFK | DVLVLLMTDV |     |
| W5UTH7_Ictaluru | QAKM---RSD | AMFRPAELLR | RQLIHEGTL  | WKTSSP-RLK | DVQVLLMTDV |     |
| E7F4U1_Danio_re | ETKV---KGG | GVFHGAELLR | RGLIHEGALL | WKTAAQ-RLK | DVHVLLMTDV |     |
| K7FEF2_Pelodisc | KAQLLWEGFS | KPFKDEELLR | RKLIHDGCLL | WKTATG-RFK | DVLVLLMTDV |     |
| Consistency     | 5548000475 | 54*566*98* | *8*9*8*59* | **98690*8* | **957****8 |     |

|                 |            |            |            |            |            |     |
|-----------------|------------|------------|------------|------------|------------|-----|
|                 |            | 560        | 570        | 580        | 590        | 600 |
| Q92974_Homo_sap | LVFLQEKDQK | YIFPTLDKPS | VVSLQNLIVR | DIANQEKGMF | LISAA--PPE |     |
| Q60875_Mus_musc | LVFLQEKDQK | YIFTSLDKPS | VVSLQNLIVR | DIANQAKGMF | LISGG--PPE |     |
| Q86583_Canis_lu | LVFLQEKDQK | YIFPALDKPS | VVSLQNLIVR | DIANQEKGMF | LISAA--PPE |     |
| Q5FVC2_Rattus_n | LVFLQEKDQK | YIFTSLDKPS | VVSLQNLIVR | DIANQAKGMF | LISGG--PPE |     |
| F1N1F7_Bos_taur | LVFLQEKDQK | YIFPALDKPS | VVSLQNLIVR | DIANQEKGMF | LISAA--PPE |     |
| Q6AX47_Xenopus  | MILLQEKDQK | YIFPTLDKSP | VISLQNLIVR | DIANQEKGMF | LISAK--PPE |     |
| Q6NY14_Xenopus  | MILLQEKDQK | YIFPTLDRSP | VISLQNLIVR | DIANQEKGMF | LISAK--PPE |     |
| H3AF10_Latimeri | LVFLQEKDQK | YTFPSMDKPS | VISLQNLIVR | DIANQERGIF | LISAA-BPPE |     |
| B2DCZ9_Sus_scro | LVFLQEKDQK | YIFPALDKPS | VVSLQNLIVR | DIANQEKGMF | LISAA--PPE |     |
| W5UTH7_Ictaluru | LVFLQEKDQK | YIFASLDKSA | VVSLQNLIVR | DIANQERGLF | LISSEFSPE  |     |
| E7F4U1_Danio_re | LVFMQEKDQK | YIFPTLDKPS | VLCQNLIVR  | DIANQQRGMF | LISHS-TPPE |     |
| K7FEF2_Pelodisc | LIFLQEKDQK | FTFPALDKPA | VISLQNLIVR | DIANQEKGMF | LLSGT--PPE |     |
| Consistency     | 9989*****9 | 96*769*977 | *88***9**  | ****78*8*  | *9*6500*** |     |

|                 |             |             |            |            |            |     |
|-----------------|-------------|-------------|------------|------------|------------|-----|
|                 |             | 610         | 620        | 630        | 640        | 650 |
| Q92974_Homo_sap | MYEVHTASRD  | DRSTWIRVIQ  | QSVRTCPSRE | DFPLIETED  | AYLRRKIMEL |     |
| Q60875_Mus_musc | MYEVHAASRD  | DRSTWIRVIQ  | QSVRLCPSRE | DFPLIETEDK | AYLRRIKTKL |     |
| Q86583_Canis_lu | MYEVHTASRD  | DRSTWVRVIQ  | QSVRVCPSRE | DFPLIETED  | AYLRRKIMEL |     |
| Q5FVC2_Rattus_n | MYEVHAASRD  | DRSTWIRVIQ  | QSVRLCPSRE | DFPLIETEDK | AYLRRIKTKL |     |
| F1N1F7_Bos_taur | MYEVHTASRD  | DRSTWIRVIQ  | QSVRVCPSRE | DFPLIETED  | AYLRRKIMEL |     |
| Q6AX47_Xenopus  | MYEVHAASRE  | VRNTWMMKHA  | QSVKVCCKRE | EFPLIETEV  | AKLRKLREVI |     |
| Q6NY14_Xenopus  | MYEVHAASRE  | ERNTWMMKHG  | QSVKVCCKRE | EFPLIETEV  | AKLRKLREVI |     |
| H3AF10_Latimeri | MYEILAAASKD | ERNTWMMKMI  | HTVSTCPKRE | EFPLIETED  | VLLRNLKDEI |     |
| B2DCZ9_Sus_scro | MYEVHTASRD  | DRSTWIRVIQ  | QSVRVCPSRE | DFPLIETED  | AYLRRKIMEL |     |
| W5UTH7_Ictaluru | MYELHAASKD  | DRNTWIRHIQ  | QAVSRCPSRE | EFPLIETEDK | ALLRRLKADI |     |
| E7F4U1_Danio_re | MYELHAASKD  | DRNTWMMKIQ  | QTVSNCPKRE | DFPLIETED  | ALLRRLRADI |     |
| K7FEF2_Pelodisc | MYEVHAASRD  | DRNTWMMKVIQ | QTVRLCPSRQ | DFPLIETETE | ASLRKLKQDM |     |
| Consistency     | **887*88    | 7*6**785*7  | 87*65*7*9  | 8*****67   | 94**788458 |     |

|                 |             |             |            |            |            |     |
|-----------------|-------------|-------------|------------|------------|------------|-----|
|                 |             | 660         | 670        | 680        | 690        | 700 |
| Q92974_Homo_sap | QQKDRALVEL  | LREKVGLFAE  | MTHFQAEEDG | GSGMALPTLP | RGLFRSESL  |     |
| Q60875_Mus_musc | QQKNQALVEL  | LQKNVELFAE  | MVHFQALKAG | FVGMPPPALP | RGLFRLESFE |     |
| Q86583_Canis_lu | QQKDKALVEL  | LREKVGLFAE  | MTHFQVEEDS | G-GVALPALP | RGLFRSESL  |     |
| Q5FVC2_Rattus_n | QQKNQALVEL  | LQKNVELFAE  | MVHFQALKAG | FIGMPPPTLP | RGLFRLESFE |     |
| F1N1F7_Bos_taur | QQKDRALVEL  | LQEKVGLFAE  | MTHFQVEEDG | SSGVPLPTLP | RGLFRSESL  |     |
| Q6AX47_Xenopus  | QQKDRVAEL   | LEEKVTLEFSK | VVQLQEGENS | --S-LTGVST | RCLFRDSDM  |     |
| Q6NY14_Xenopus  | QQKDREVSEL  | LEEKVTLEFSK | VVQLQAGENS | --QPGIGAP  | RCLFRDSTD  |     |
| H3AF10_Latimeri | QQKDREIQEL  | LEERVNLFSE  | VLQLQASQEV | ---PLNPN   | RNLFRSDSAN |     |
| B2DCZ9_Sus_scro | QQKDRALVEL  | LQEKVGLFAE  | MTHFQVEEDG | GGMFLPTLP  | RGLFRSESL  |     |
| W5UTH7_Ictaluru | QQKDRREVLEL | LQERVTLFSD  | LAEVMCGQEL | ---VLPN    | RNLFRADTFQ |     |
| E7F4U1_Danio_re | QQKDREVLEL  | LQERVTLFSD  | LEATGGQNV  | ---TVPTN   | RNLFRADTFY |     |
| K7FEF2_Pelodisc | AQRDREITEL  | LEEKVGLFTE  | MLSLQSGCED | ---PPACPAP | RTLFRAESLE |     |
| Consistency     | 8*988685**  | *787*4**77  | 7655854654 | 0022545446 | *49**58846 |     |

|                 |            |            |            |             |            |     |
|-----------------|------------|------------|------------|-------------|------------|-----|
|                 |            | 710        | 720        | 730         | 740        | 750 |
| Q92974_Homo_sap | SPRGERLLQD | AIREVEGLKD | LLVGPVVELL | LTREPAPLPL  | E-PDSGGNTS |     |
| Q60875_Mus_musc | SLRGERLLKD | AIREVEGLKD | LLGPCVDLP  | MTSREPAPLPL | D-SDSGS--C |     |
| Q86583_Canis_lu | SPRGERLLQD | AIREVEGLKD | LLVGPVVELL | LTFRDPALLV  | D-PDSGGSTS |     |
| Q5FVC2_Rattus_n | SLRGERLLKD | AIREVEGLKD | LLGPCVDLP  | LTAREPALPV  | E-ADSGS--C |     |



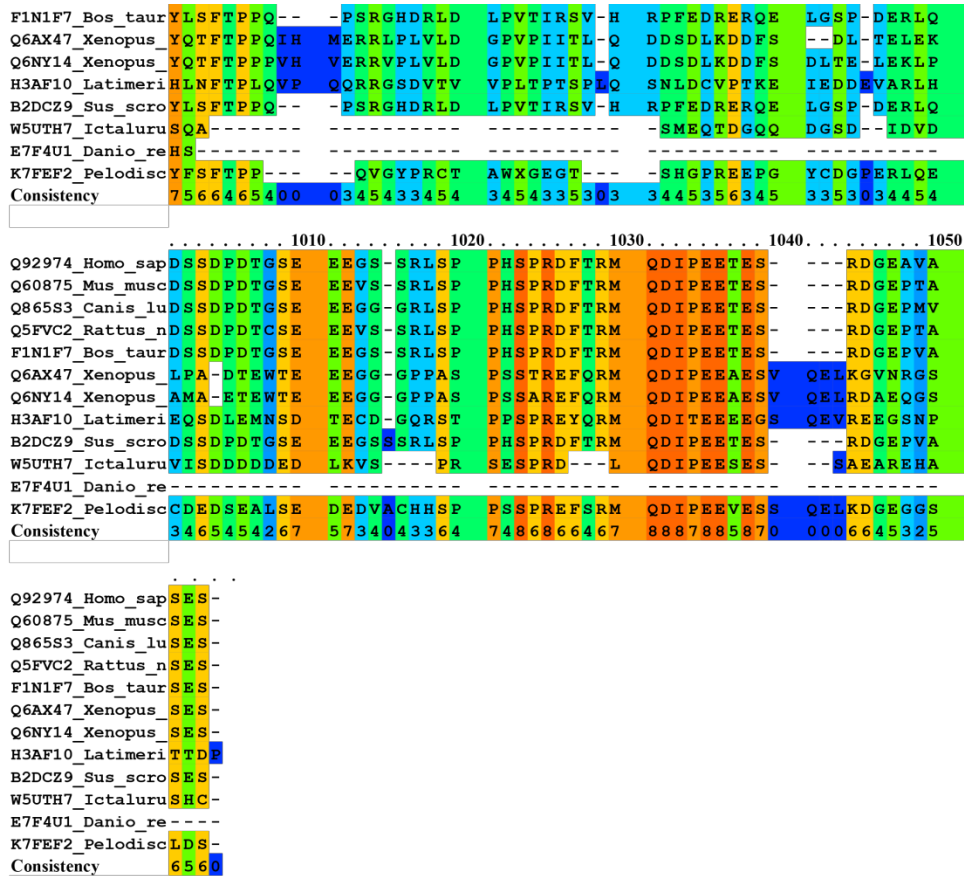

Alignment score = 903772.00  
 Alignment score per aligned residue pair = 14.73  
 Sequence identities = 41201  
 Percent sequence identity = 0.67  
 Number of sequences = 12  
 Alignment length = 1054  
 Number of residues = 11577  
 Number of gaps = 1071  
 Date of the analysis: 11/30/2016

**Figure S2. Full alignment of ARHGEF2 orthologs in vertebrates.**

The color code is based on the conserved residues with red or 10 being the most conserved. The conservation score is performed by PRALINE.

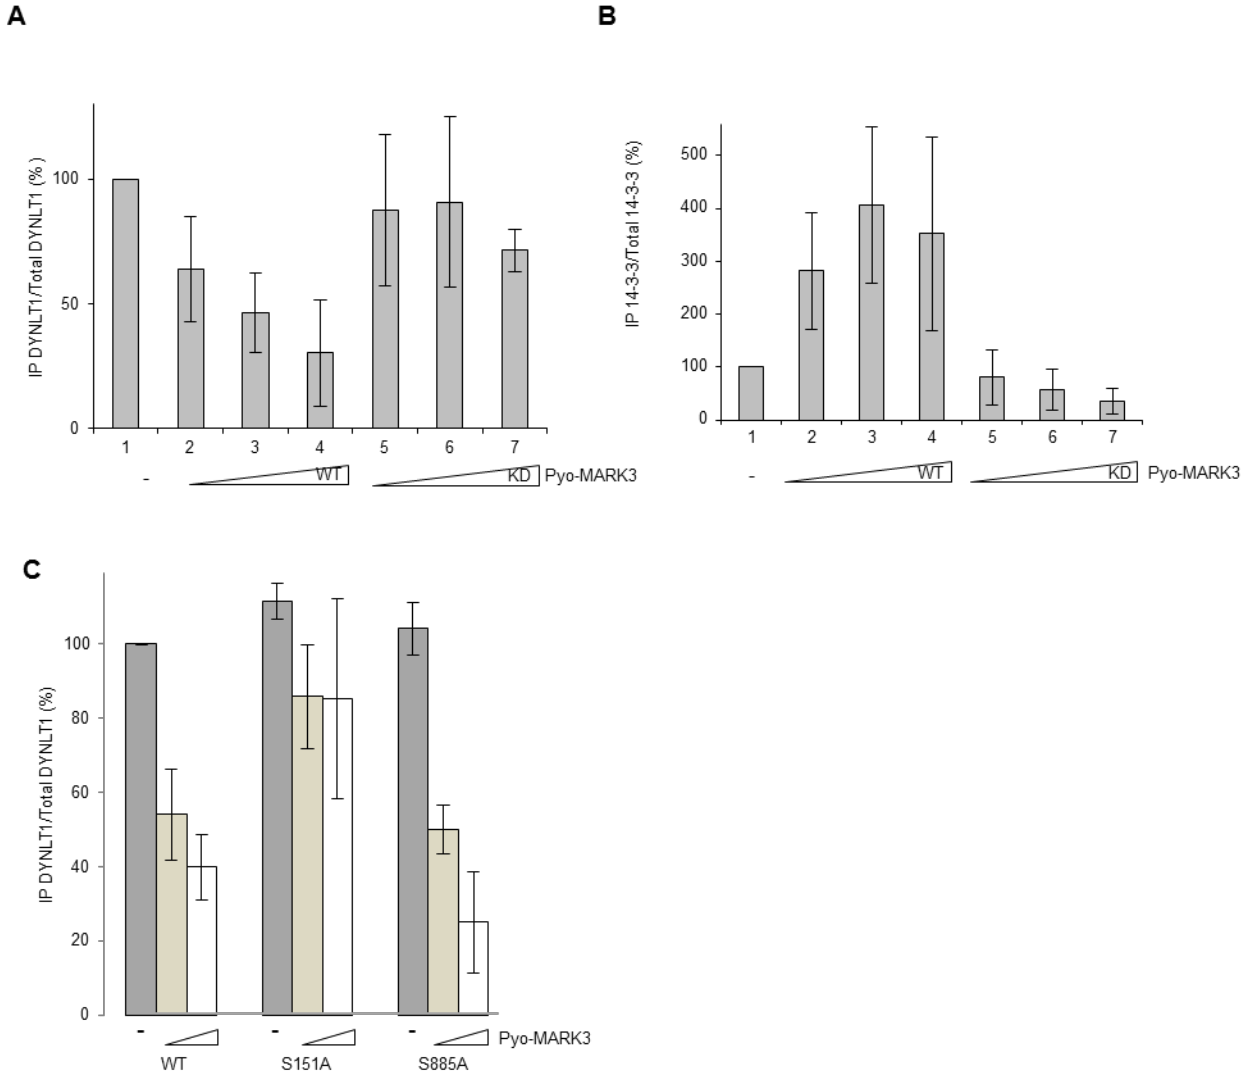

**Figure S3. Quantitative analysis of the effect of MARK3 phosphorylation of ARHGEF2 on its interactions with DYNLT1 and 14-3-3.**

(A, B) Quantification of the DYNLT1 and 14-3-3 interactions with ARHGEF2 in the presence of increasing wild-type MARK3 (WT) or kinase-deficient MARK3 (KD) as observed in [Figure 3C](#). Data in (A) and (B) are means  $\pm$  SD from four independent experiments. C) Quantification of DYNLT1 interaction with wild-type ARHGEF2 (WT) and its mutants S151A and S885A in the presence of increasing amounts of MARK3 as observed in [Figure 3D](#). Data in (C) are means  $\pm$  SD from three independent experiments.

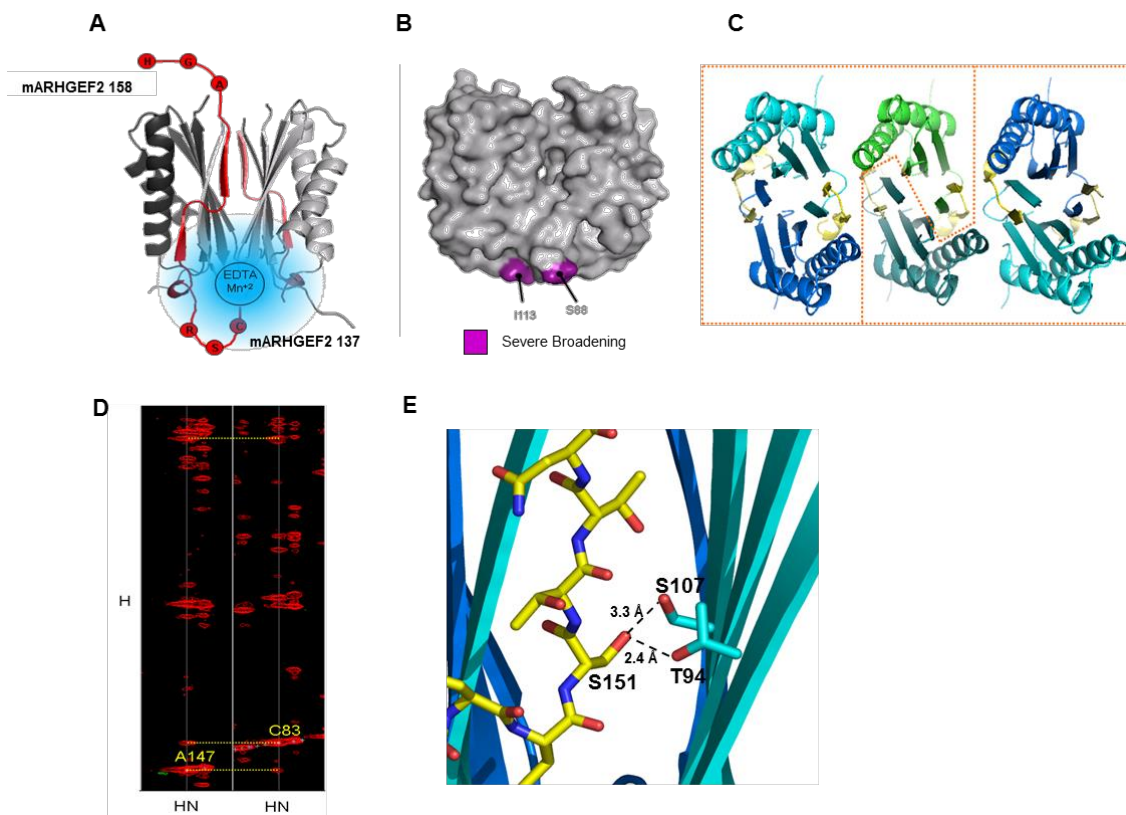

**Figure S4. Structural characterization of the DYNLT1-ARHGEF2 interaction.**

(A) Schematic representation of the PRE-tag conjugated to the N-terminus of the ARHGEF2 peptide (137-158). (B) Residues exhibiting substantial peak broadening induced by the addition of the PRE-tagged peptide. (C) Crystallographic contact sites of the DYNLT1-ARHGEF2 (peptides 136-164) chimera. Three molecules of DYNLT1/ARHGEF2 (136-164) chimera are present in the asymmetric unit (outlined in orange), two of which form homodimers, while the third forms a dimer with a molecule in another crystallographic symmetry unit. ARHGEF2 residues are highlighted in yellow. The asymmetric units are related to each other by the space group P3121. (D) Nuclear Overhauser Effect Spectroscopy (NOESY). Strips of the NOESY spectrum of the DYNLT1-ARHGEF2 chimera highlighting NOE connections between residues A147 and C83, consistent with the crystal structure. (E) ARHGEF2 Ser<sup>151</sup> side chain hydrogen bonds with DYNLT1. Hydrogen bonds formed by the side chain hydroxyl group of ARHGEF2 Ser<sup>151</sup> with the side chain hydroxyls of DYNLT1 T94 and S107 are shown as dashed lines with distances between oxygen atoms indicated.



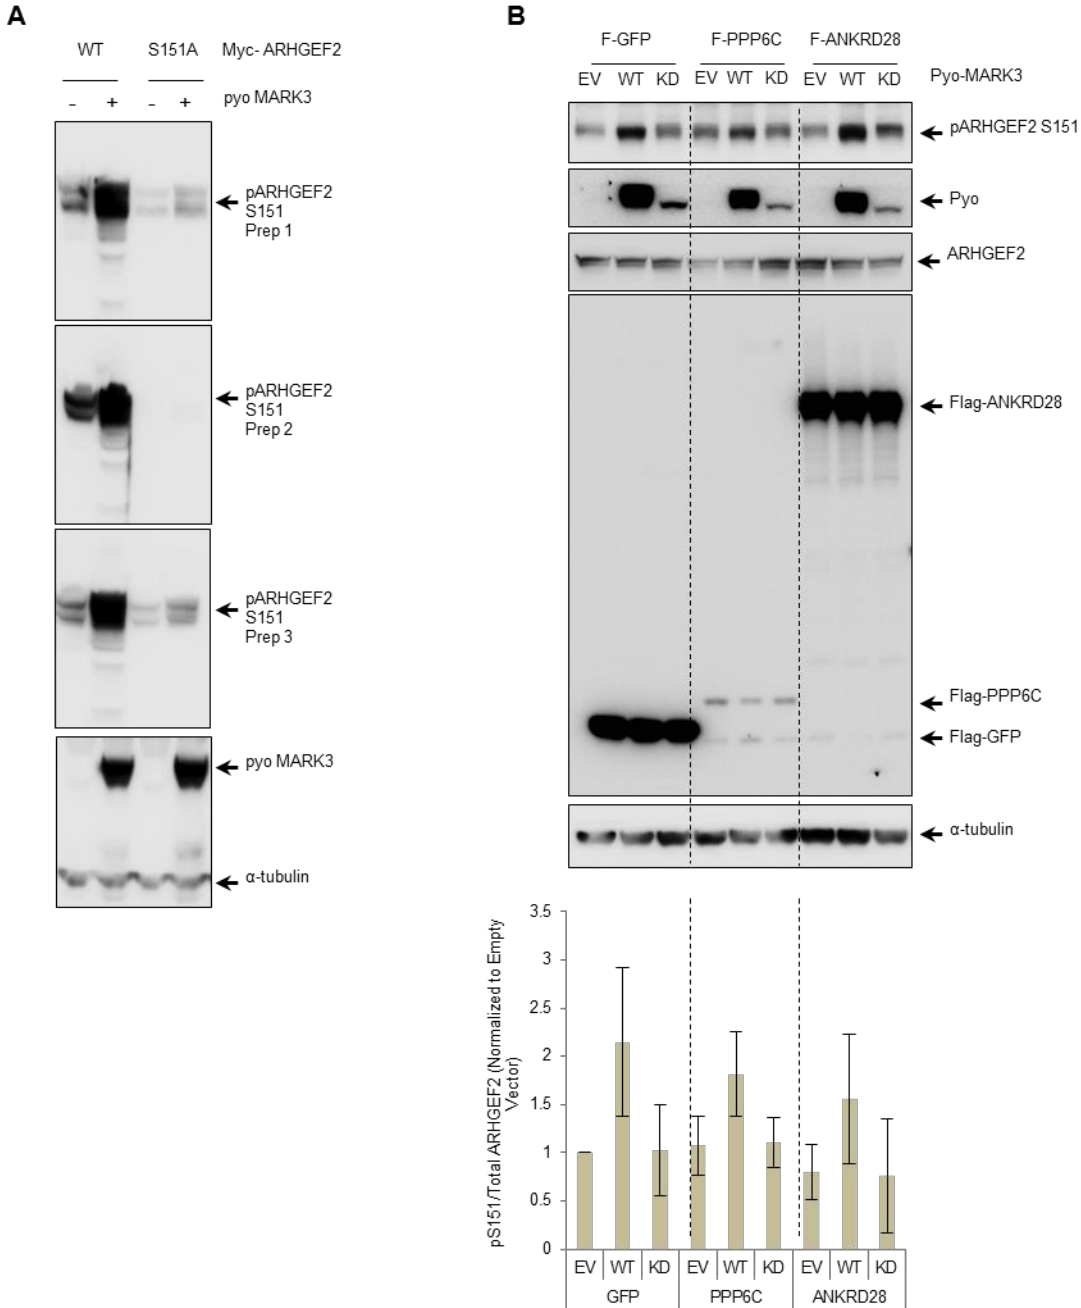

**Figure S5. MARK3 but not PP6 regulates the phosphorylation of ARHGEF2 Ser<sup>151</sup>.**

(A) Validation of the specificity of the ARHGEF2 phospho-S151 antibody. Western blot of HEK293T overexpressing Myc-tagged wild-type ARHGEF2 (WT) or the mutant (S151A) alone or in the presence of pyo-tagged MARK3 probed with three different preparations of phospho-S151-specific antibodies (designed by Cell Signaling Technology). We retained prep 2 for our analysis. (B) Western blot of tetracycline-inducible HEK293 cell lines carrying inducible expression of Flag-tagged GFP, catalytic subunit PPP6C and regulatory subunit ANKRD28. The cells were induced overnight with tetracycline (500ng/ml) and transfected with empty vector (EV), wild type MARK3 (WT) or kinase deficient MARK3 (KD). Endogenous ARHGEF2 phosphorylation was evaluated using the phospho-S151 specific antibodies from panel A. Data are means  $\pm$  SD of four independent experiments.

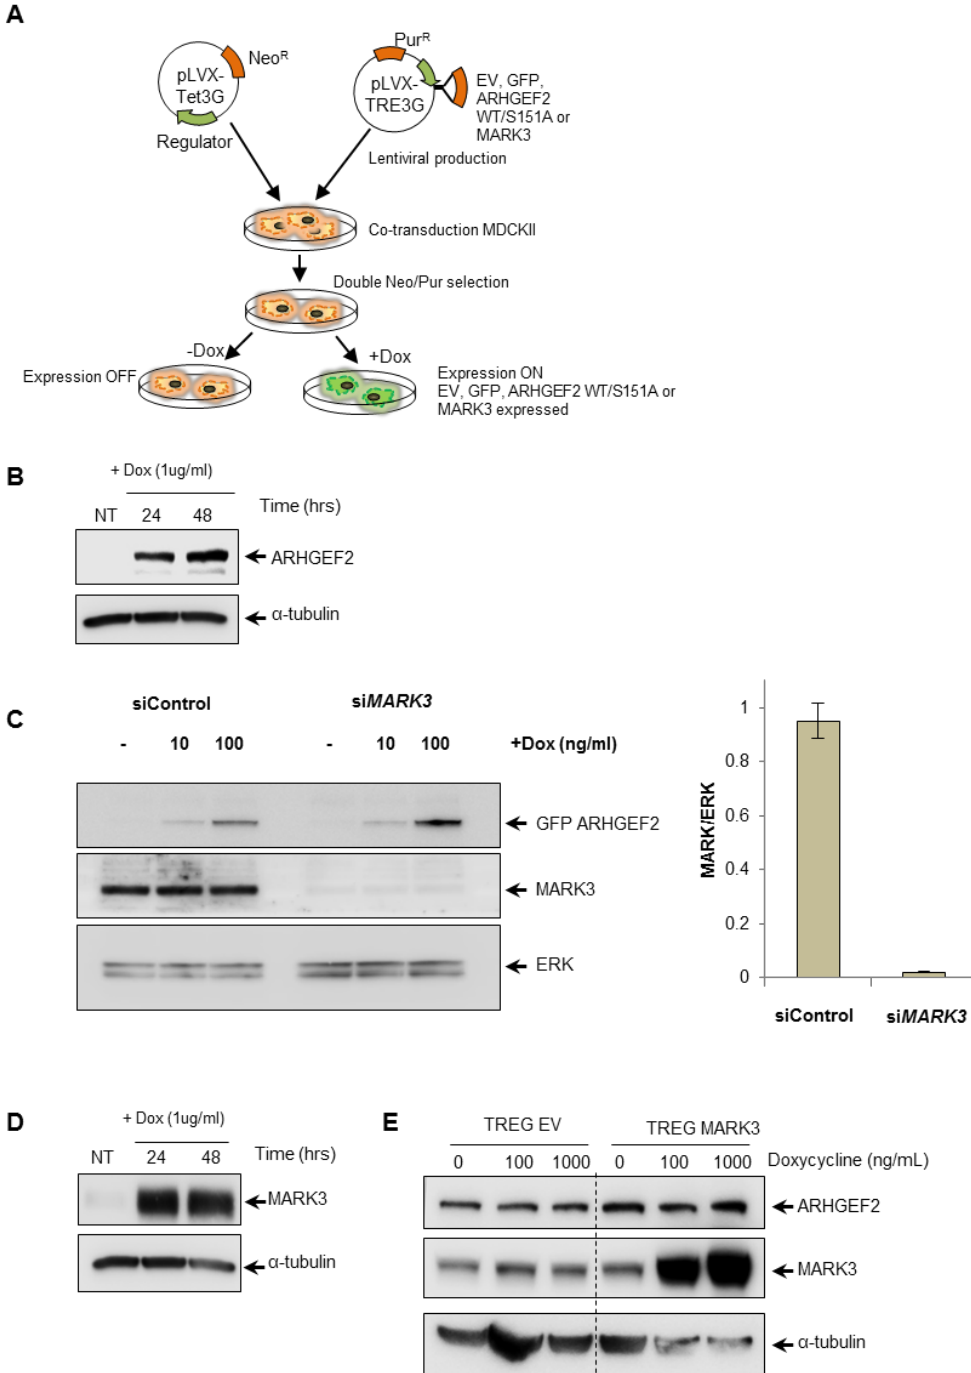

**Figure S6. Generation and validation of inducible cells.**

(A) Schematic of the generation process of MDCKII cells stably expressing MARK3, ARHGEF2<sup>WT</sup> or ARHGEF2<sup>S151A</sup> under control of a tetracycline-inducible (TETi) promoter. (B) WB of the selected colonies expressing inducible ARHGEF2. (C) WB of inducible MDCKII cells expressing pLVX-GFP ARHGEF2<sup>WT</sup> with increasing doses of doxycycline treated with a control or a of specific pool of *MARK3* siRNA. Right panel: quantification of MARK3 protein is shown. Data are means  $\pm$  SD of three independent experiments. (D) Validation of inducible MARK3. (E) Evaluation of the effect of EV and MARK3 induction on ARHGEF2 expression. (B, D and E. Representative of three independent experiments.

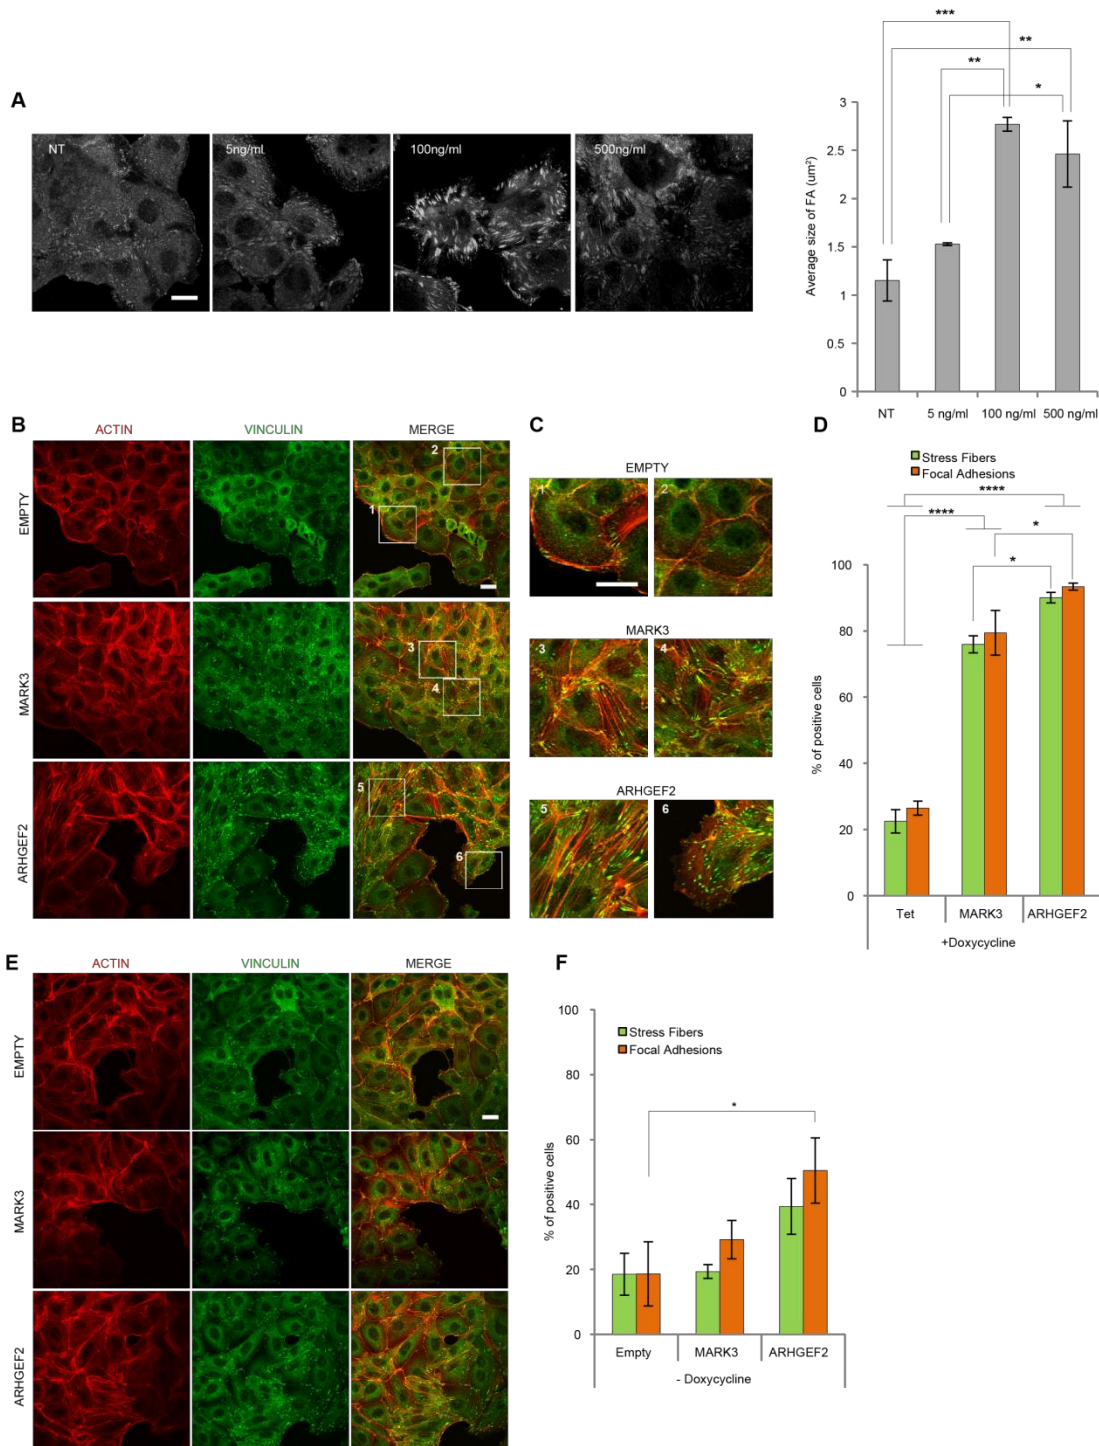

**Figure S7. MARK3 affects the biological activity of ARHGEF2.**

(A) Immunofluorescence of inducible MDCKII cells expressing pLVX-GFP ARHGEF2<sup>WT</sup> in the presence of increasing doses of doxycycline fixed and stained for VINCULIN. Four high magnification fields per experiment were quantified. Data are means of two independent experiments. Scale bar, 20 μm. Statistical significance was determined by a one-way ANOVA test with a Bonferroni post-test correction for multiple comparisons. \*P=0.0165; \*\*P=0.023 (5 ng VS 100 ng) and \*\*P=0.0017 (NT VS 500 ng); \*\*\*P=0.0003. (B) MDCKII cells expressing inducible pLVX-Empty Vector, MARK3 or wild-type ARHGEF2. Confocal images of subconfluent cells induced

with 100 ng/mL of doxycycline for 18 hours, fixed and stained for ACTIN and VINCULIN. (C) Detail of the boxed areas shown in A. (D) Quantification of stress fibers and focal adhesions of images shown in A, expressed as percent of positive cells. (E) Uninduced MDCKII as in (B), treated with DMSO 18 hours. In (F) quantification of images shown in (E). Scale bars, 20  $\mu$ m. Data in (D) and (F) are means  $\pm$  SD of three independent experiments, a total of n=100-200 cells per condition were counted.. Statistical significance was determined by a two-way ANOVA test with a Bonferroni post-test correction for multiple comparisons. In (D), \*P=0.0136 for SF and \*P=0.0143 for FA; \*\*\*P<0.0001., In (F) \*P=0.0182.

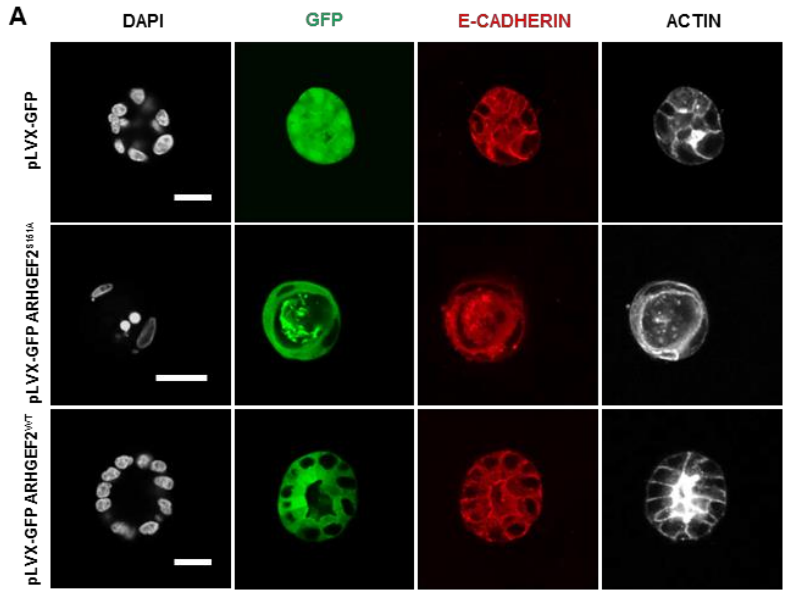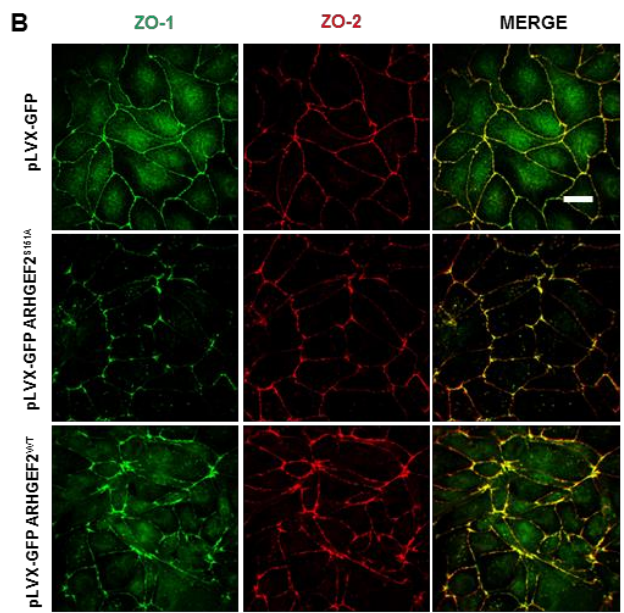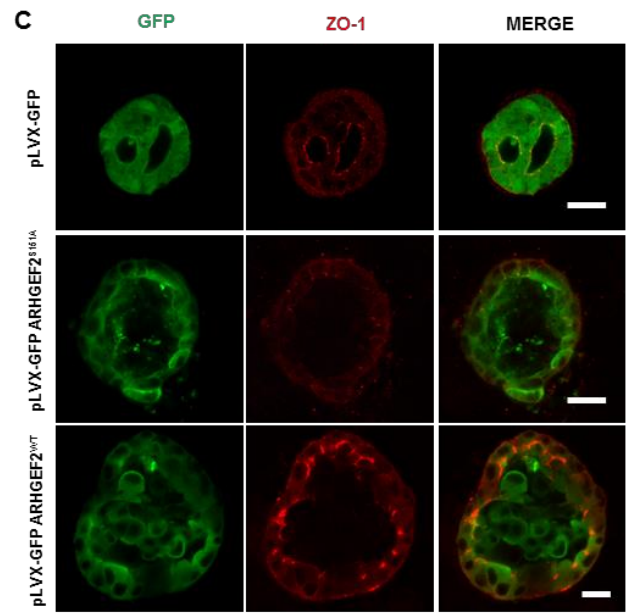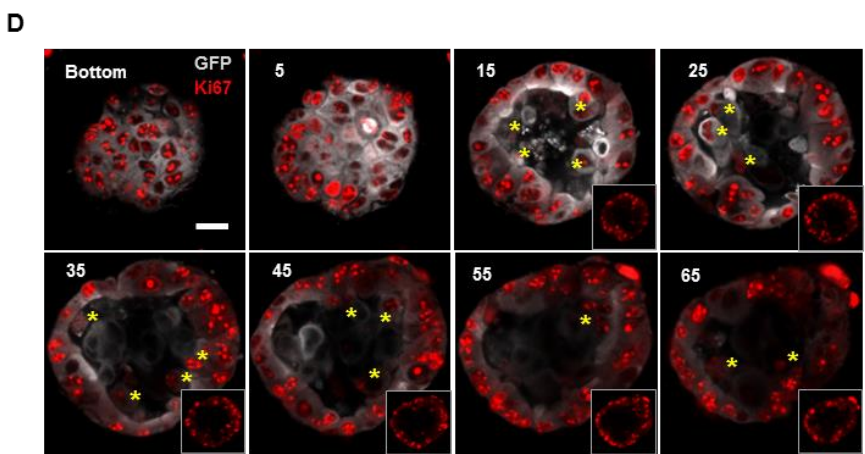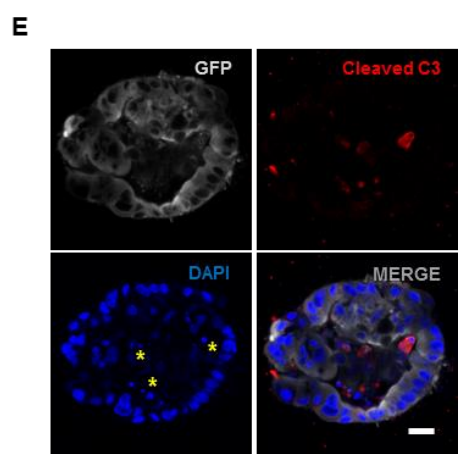

**Figure S8. Phosphorylation of ARHGEF2 Ser<sup>151</sup> is required for normal cell polarity**

(A) 3D culture at four days of MDCKII cells expressing inducible pLVX-GFP, pLVX-GFP ARHGEF2<sup>WT</sup> or mutant S151A. GFP fluorescence was visualized and cysts were stained for E-CADHERIN, ACTIN and DAPI. Representative of two independent experiments. Scale bar 20  $\mu$ m. (B,C) Tight junction staining in MDCKII expressing pLVX-GFP, pLVX-GFP ARHGEF2<sup>WT</sup> or mutant S151A. In (B), 2D staining of ZO-1 and ZO-2. In (C), 3D staining of ZO-1. Scale bar 20  $\mu$ m. Representative of three independent experiments. (D, E) Ki67 and cleaved caspase 3 staining in MDCKII spheroids expressing inducible pLVX-GFP ARHGEF2<sup>WT</sup> at day seven. In (D), Ki67 staining through different Z stacks (the number represent the Z stack step in  $\mu$ m), the yellow asterisks mark the luminal cells proliferating. Representative of two independent experiments. Scale bar 20  $\mu$ m. In (E), Cleaved Caspase 3 (C3) staining; the yellow asterisks mark the groups of apoptotic luminal cells that coincide with luminal nuclear fragmentation as observed in the DAPI staining. Scale bar 20  $\mu$ m. Representative of two independent experiments.

| Summary |            |                 |                                                                          |                |    | FlagBirA*-ARHGEF2 |      |      |             |             |
|---------|------------|-----------------|--------------------------------------------------------------------------|----------------|----|-------------------|------|------|-------------|-------------|
| Gene ID | Protein ID | Gene Nam        | Full name                                                                | Top 3 controls |    |                   | A    | B    | Total       | SAINT       |
| 9181    | 15011974   | <b>ARHGEF2</b>  | <i>Rho/Rac guanine nucleotide exchange factor 2</i>                      |                |    |                   | 2388 | 2739 | <b>5127</b> | -           |
| 9859    | 109255228  | <b>CEP170</b>   | <i>centrosomal protein 170kDa</i>                                        | 38             | 35 | 31                | 236  | 140  | <b>376</b>  | <b>1.00</b> |
| 26586   | 148664244  | <b>CKAP2</b>    | <i>cytoskeleton associated protein 2</i>                                 | 1              |    |                   | 106  | 51   | <b>157</b>  | <b>1.00</b> |
| 55291   | 255918192  | <b>PPP6R3</b>   | <i>protein phosphatase 6 regulatory subunit 3</i>                        | 10             | 4  | 4                 | 82   | 47   | <b>129</b>  | <b>1.00</b> |
| 23243   | 68131557   | <b>ANKRD28</b>  | <i>ankyrin repeat domain 28</i>                                          | 3              | 1  |                   | 86   | 42   | <b>128</b>  | <b>1.00</b> |
| 79649   | 147903302  | <b>MAP7D3</b>   | <i>MAP7 domain containing 3</i>                                          | 7              | 7  | 5                 | 68   | 26   | <b>94</b>   | <b>1.00</b> |
| 22870   | 151101459  | <b>PPP6R1</b>   | <i>protein phosphatase 6 regulatory subunit 1</i>                        | 4              | 2  | 1                 | 62   | 28   | <b>90</b>   | <b>1.00</b> |
| 54477   | 19923493   | <b>PLEKHA5</b>  | <i>pleckstrin homology domain containing A5</i>                          |                |    |                   | 66   | 21   | <b>87</b>   | <b>1.00</b> |
| 283373  | 157743284  | <b>ANKRD52</b>  | <i>ankyrin repeat domain 52</i>                                          |                |    |                   | 67   | 15   | <b>82</b>   | <b>1.00</b> |
| 9701    | 37537701   | <b>PPP6R2</b>   | <i>protein phosphatase 6 regulatory subunit 2</i>                        |                |    |                   | 41   | 17   | <b>58</b>   | <b>1.00</b> |
| 2011    | 254028234  | <b>MARK2</b>    | <i>microtubule affinity regulating kinase 2</i>                          | 2              |    |                   | 35   | 14   | <b>49</b>   | <b>1.00</b> |
| 5358    | 209862851  | <b>PLS3</b>     | <i>plastin 3</i>                                                         | 8              | 8  | 7                 | 22   | 26   | <b>48</b>   | <b>0.90</b> |
| 5537    | 183603929  | <b>PPP6C</b>    | <i>protein phosphatase 6 catalytic subunit</i>                           | 5              | 3  | 2                 | 32   | 14   | <b>46</b>   | <b>1.00</b> |
| 157922  | 186659512  | <b>CAMSAP1</b>  | <i>calmodulin regulated spectrin associated protein 1</i>                | 2              | 2  | 1                 | 38   | 6    | <b>44</b>   | <b>0.94</b> |
| 22919   | 6912494    | <b>MAPRE1</b>   | <i>microtubule associated protein RP/EB family member 1</i>              | 6              | 4  | 4                 | 24   | 19   | <b>43</b>   | <b>1.00</b> |
| 220134  | 21450832   | <b>SKA1</b>     | <i>spindle and kinetochore associated complex subunit 1</i>              |                |    |                   | 26   | 13   | <b>39</b>   | <b>1.00</b> |
| 4137    | 8400715    | <b>MAPT</b>     | <i>microtubule associated protein tau</i>                                | 1              |    |                   | 22   | 16   | <b>38</b>   | <b>1.00</b> |
| 4140    | 193083125  | <b>MARK3</b>    | <i>microtubule affinity regulating kinase 3</i>                          | 4              | 3  |                   | 25   | 9    | <b>34</b>   | <b>1.00</b> |
| 55201   | 50428935   | <b>MAP1S</b>    | <i>microtubule associated protein 1S</i>                                 |                |    |                   | 24   | 9    | <b>33</b>   | <b>1.00</b> |
| 9053    | 310750366  | <b>MAP7</b>     | <i>microtubule associated protein 7</i>                                  |                |    |                   | 23   | 10   | <b>33</b>   | <b>1.00</b> |
| 57509   | 50348611   | <b>MTUS1</b>    | <i>microtubule associated tumor suppressor 1</i>                         |                |    |                   | 21   | 12   | <b>33</b>   | <b>1.00</b> |
| 4690    | 5453754    | <b>NCK1</b>     | <i>NCK adaptor protein 1</i>                                             | 4              | 4  | 3                 | 20   | 12   | <b>32</b>   | <b>0.91</b> |
| 51512   | 253970412  | <b>GTSE1</b>    | <i>G2 and S-phase expressed 1</i>                                        |                |    |                   | 24   | 4    | <b>28</b>   | <b>1.00</b> |
| 5528    | 31083280   | <b>PPP2R5D</b>  | <i>protein phosphatase 2 regulatory subunit B', delta</i>                | 3              | 2  |                   | 17   | 8    | <b>25</b>   | <b>0.94</b> |
| 23271   | 44955929   | <b>CAMSAP2</b>  | <i>calmodulin regulated spectrin associated protein family member 2</i>  |                |    |                   | 20   | 4    | <b>24</b>   | <b>1.00</b> |
| 256714  | 270483740  | <b>MAP7D2</b>   | <i>MAP7 domain containing 2</i>                                          |                |    |                   | 17   | 4    | <b>21</b>   | <b>1.00</b> |
| 10298   | 5031975    | <b>PAK4</b>     | <i>p21 protein (Cdc42/Rac)-activated kinase 4</i>                        | 4              | 2  | 1                 | 10   | 8    | <b>18</b>   | <b>0.79</b> |
| 9201    | 4758128    | <b>DCLK1</b>    | <i>doublecortin like kinase 1</i>                                        | 2              |    |                   | 9    | 7    | <b>16</b>   | <b>1.00</b> |
| 51248   | 7706025    | <b>PDZD11</b>   | <i>PDZ domain containing 11</i>                                          |                |    |                   | 9    | 6    | <b>15</b>   | <b>1.00</b> |
| 9928    | 7661878    | <b>KIF14</b>    | <i>kinesin family member 14</i>                                          | 1              |    |                   | 11   | 3    | <b>14</b>   | <b>0.99</b> |
| 283638  | 163644261  | <b>KIAA0284</b> | <i>centrosomal protein 170B</i>                                          |                |    |                   | 8    | 4    | <b>12</b>   | <b>1.00</b> |
| 79884   | 88759339   | <b>MAP9</b>     | <i>microtubule associated protein 9</i>                                  |                |    |                   | 8    | 4    | <b>12</b>   | <b>1.00</b> |
| 23332   | 214010173  | <b>CLASP1</b>   | <i>cytoplasmic linker associated protein 1</i>                           |                |    |                   | 9    | 3    | <b>12</b>   | <b>0.99</b> |
| 1855    | 32479521   | <b>DVL1</b>     | <i>dishevelled segment polarity protein 1</i>                            |                |    |                   | 5    | 4    | <b>9</b>    | <b>1.00</b> |
| 121441  | 206597465  | <b>NEDD1</b>    | <i>neural precursor cell expressed, developmentally down-regulated 1</i> | 1              |    |                   | 5    | 4    | <b>9</b>    | <b>1.00</b> |
| 6729    | 226371618  | <b>SRP54</b>    | <i>signal recognition particle 54kDa</i>                                 | 1              |    |                   | 4    | 3    | <b>7</b>    | <b>0.99</b> |

**Table S1. ARHGEF2 interactors reported in this study –Summary.**

Summary of the BioID analysis for ARHGEF2. The spectral counts of the top 3 controls out of 14 are shown. “A” and “B” denote two independent biological replicates. “Total” is the sum of the spectral counts for the prey. Bait Spectral Counts are highlighted in yellow. SAINT or significant analysis interactome score >0.79 was used to identify *bona fide* interactors.

| GO biological process complete                               | Accession number                                   | Homo sapiens<br>- REFLIST<br>(20972) | upload_1 (35) | upload_1<br>(expected) | upload_1<br>(over/under) | upload_1<br>(fold<br>Enrichment) | upload_1 (P-<br>value) | -Log <sub>10</sub> P-value |
|--------------------------------------------------------------|----------------------------------------------------|--------------------------------------|---------------|------------------------|--------------------------|----------------------------------|------------------------|----------------------------|
| microtubule cytoskeleton organization                        | GO:0000226                                         | 397                                  | 12            | 0.66                   | +                        | 18.11                            | 9.90E-09               | 8.004365                   |
| cytoskeleton organization                                    | GO:0007010                                         | 960                                  | 16            | 1.6                    | +                        | 9.99                             | 5.50E-09               | 8.259637                   |
| single-organism organelle organization                       | GO:1902589                                         | 1547                                 | 16            | 2.58                   | +                        | 6.2                              | 6.70E-06               | 5.173925                   |
| microtubule-based process                                    | GO:0007017                                         | 574                                  | 13            | 0.96                   | +                        | 13.57                            | 3.41E-08               | 7.467246                   |
| regulation of microtubule cytoskeleton organization          | GO:0070507                                         | 129                                  | 5             | 0.22                   | +                        | 23.22                            | 2.06E-02               | 1.686133                   |
| regulation of microtubule polymerization or depolymerization | GO:0031110                                         | 56                                   | 5             | 0.09                   | +                        | 53.5                             | 3.46E-04               | 3.460924                   |
| regulation of microtubule-based process                      | GO:0032886                                         | 153                                  | 5             | 0.26                   | +                        | 19.58                            | 4.70E-02               | 1.327902                   |
| negative regulation of microtubule binding                   | GO:1904527                                         | 2                                    | 2             | 0                      | +                        | > 100                            | 4.54E-02               | 1.342944                   |
| COPII vesicle coating                                        | GO:0048208                                         | 61                                   | 4             | 0.1                    | +                        | 39.29                            | 2.93E-02               | 1.533132                   |
| COPII-coated vesicle budding                                 | GO:0090114                                         | 64                                   | 4             | 0.11                   | +                        | 37.45                            | 3.54E-02               | 1.450997                   |
| cellular localization                                        | GO:0051641                                         | 2131                                 | 15            | 3.56                   | +                        | 4.22                             | 4.73E-03               | 2.325139                   |
| organelle organization                                       | GO:0006996                                         | 2952                                 | 23            | 4.93                   | +                        | 4.67                             | 3.21E-08               | 7.493495                   |
| cellular component organization                              | GO:0016043                                         | 5382                                 | 26            | 8.98                   | +                        | 2.89                             | 2.03E-05               | 4.692504                   |
| cellular component organization or biogenesis                | GO:0071840                                         | 5548                                 | 26            | 9.26                   | +                        | 2.81                             | 4.09E-05               | 4.388277                   |
| vesicle coating                                              | GO:0006901                                         | 63                                   | 4             | 0.11                   | +                        | 38.04                            | 3.33E-02               | 1.477556                   |
| protein complex subunit organization                         | GO:0071822                                         | 1205                                 | 11            | 2.01                   | +                        | 5.47                             | 2.17E-02               | 1.663540                   |
| vesicle targeting, rough ER to cis-Golgi                     | GO:0048207                                         | 61                                   | 4             | 0.1                    | +                        | 39.29                            | 2.93E-02               | 1.533132                   |
| vesicle targeting, to, from or within Golgi                  | GO:0048199                                         | 65                                   | 4             | 0.11                   | +                        | 36.87                            | 3.76E-02               | 1.424812                   |
| vesicle targeting                                            | GO:0006903                                         | 77                                   | 5             | 0.13                   | +                        | 38.91                            | 1.66E-03               | 2.779892                   |
| organelle localization                                       | GO:0051640                                         | 462                                  | 9             | 0.77                   | +                        | 11.67                            | 4.31E-04               | 3.365523                   |
| establishment of organelle localization                      | GO:0051656                                         | 395                                  | 8             | 0.66                   | +                        | 12.14                            | 1.99E-03               | 2.701147                   |
| mitotic cell cycle process                                   | GO:1903047                                         | 761                                  | 9             | 1.27                   | +                        | 7.09                             | 2.74E-02               | 1.562249                   |
| mitotic cell cycle                                           | GO:0000278                                         | 789                                  | 10            | 1.32                   | +                        | 7.59                             | 3.68E-03               | 2.434152                   |
| establishment or maintenance of cell polarity                | GO:0007163                                         | 154                                  | 5             | 0.26                   | +                        | 19.45                            | 4.85E-02               | 1.314258                   |
| Unclassified                                                 | UNCLASSIFIED                                       | 3875                                 | 5             | 6.47                   | -                        | 0.77                             | 0.00E+00               |                            |
| Analysis Type:                                               | PANTHER Overrepresentation Test (release 20160715) |                                      |               |                        |                          |                                  |                        |                            |
| Annotation Version and Release Date:                         | GO Ontology database Released 2016-12-28           |                                      |               |                        |                          |                                  |                        |                            |
| Analyzed List:                                               | upload_1 (Homo sapiens)                            |                                      |               |                        |                          |                                  |                        |                            |
| Reference List:                                              | Homo sapiens (all genes in database)               |                                      |               |                        |                          |                                  |                        |                            |
| Bonferroni correction:                                       | TRUE                                               |                                      |               |                        |                          |                                  |                        |                            |
| Bonferroni count:                                            | 8404                                               |                                      |               |                        |                          |                                  |                        |                            |

**Table S2. GO enrichment analysis of the ARHGEF2 network.**

Enrichment analysis of the ARHGEF2 network, based on biological process, performed using <http://www.geneontology.org/>. The analysis results are sorted hierarchically, based on their ontology. The most specific subclass first, with its parent terms indented directly below it. ARHGEF2 was excluded from the analysis. – Log<sub>10</sub> of the P value was calculated and used to generate the graph in Figure S1B.



| Gene ID | Gene Name          | Saint Score | Previously Validated | Function                                                                                                                                                                                                                                                                                            |
|---------|--------------------|-------------|----------------------|-----------------------------------------------------------------------------------------------------------------------------------------------------------------------------------------------------------------------------------------------------------------------------------------------------|
| 23243   | ANKRD28            | 1           | Yes                  | Putative regulatory subunit of protein phosphatase 6, involved in mitosis and chromosome segregation.                                                                                                                                                                                               |
| 283373  | ANKRD52            | 1           |                      | Putative regulatory subunit of protein phosphatase 6, involved in mitosis and chromosome segregation.                                                                                                                                                                                               |
| 157922  | CAMSAP1            | 0.94        |                      | Regulation of cell morphology and cytoskeletal organization. Microtubule stabilization.                                                                                                                                                                                                             |
| 23271   | CAMSAP2            | 1           |                      | Microtubule minus-end binding protein that may regulate the organization of non-centrosomal microtubules. Microtubule stabilization.                                                                                                                                                                |
| 9859    | CEP170             | 1           | Yes                  | Centrosomal protein. Microtubule organization and cell morphology.                                                                                                                                                                                                                                  |
| 283638  | CEP170B (KIAA0284) | 1           |                      | Centrosomal protein. Microtubule organization.                                                                                                                                                                                                                                                      |
| 26586   | CKAP2              | 1           |                      | Stabilizes microtubules and plays a role in the regulation of cell division.                                                                                                                                                                                                                        |
| 23332   | CLASP1             | 0.99        |                      | Microtubule plus-end tracking protein that promotes the stabilization of dynamic microtubules. Required for the polarization of the cytoplasmic microtubule arrays in migrating cells towards the leading edge of the cell.                                                                         |
| 9201    | DCLK1              | 1           |                      | Involved in a calcium- signaling pathway controlling neuronal migration in the developing brain.                                                                                                                                                                                                    |
| 1855    | DVL1               | 1           |                      | Regulates cell proliferation, acting as a transducer molecule for developmental processes, including segmentation and neuroblast specification.                                                                                                                                                     |
| 51512   | GTSE1              | 1           |                      | May be involved in p53-induced cell cycle arrest in G2/M phase by interfering with microtubule rearrangements that are required to enter mitosis.                                                                                                                                                   |
| 9928    | KIF14              | 0.99        |                      | Plays an essential role in cytokinesis.                                                                                                                                                                                                                                                             |
| 55201   | MAP15              | 1           |                      | Microtubule-associated protein that mediates aggregation of mitochondria resulting in cell death and genomic destruction. Plays a role in anchoring the microtubule organizing center to the centrosomes. Binds to DNA. Plays a role in apoptosis. Involved in the formation of microtubule bundles |
| 9053    | MAP7               | 1           |                      | Microtubule-stabilizing protein that may play an important role during reorganization of microtubules during polarization and differentiation of epithelial cells. Associates with microtubules in a dynamic manner. May play a role in the formation of intercellular contacts.                    |
| 256714  | MAP7D2             | 1           |                      | Involved in microtubule stabilization.                                                                                                                                                                                                                                                              |
| 79649   | MAP7D3             | 1           |                      | Promotes the assembly and stability of microtubules                                                                                                                                                                                                                                                 |
| 79884   | MAP9               | 1           |                      | Involved in organization of the bipolar mitotic spindle. Required for bipolar spindle assembly, mitosis progression and cytokinesis. May act by stabilizing interphase microtubules.                                                                                                                |
| 22919   | MAPRE1             | 1           |                      | Binds to the plus end of microtubules and regulates the dynamics of the microtubule cytoskeleton. Promotes cytoplasmic microtubule nucleation and elongation. May be involved in spindle function by stabilizing microtubules and anchoring them at centrosomes. May play a role in cell migration. |
| 4137    | MAPT               | 1           |                      | Promotes microtubule assembly and stability, and might be involved in the establishment and maintenance of neuronal polarity.                                                                                                                                                                       |
| 2011    | MARK2              | 1           | Yes                  | Involved in cell polarity and microtubule dynamics regulation. Plays a key role in cell polarity by phosphorylating the microtubule-associated proteins MAP2, MAP4 and MAPT/TAU at KXGS motifs, causing detachment from microtubules, and their disassembly.                                        |
| 4140    | MARK3              | 1           |                      | Involved in the specific phosphorylation of microtubule- associated proteins for tau, MAP2 and MAP4.                                                                                                                                                                                                |
| 57509   | MTUS1              | 1           |                      | Microtubule associated tumor suppressor 1. Cooperates with AGTR2 to inhibit ERK2 activation and cell proliferation.                                                                                                                                                                                 |
| 4690    | NCK1               | 0.91        |                      | Adaptor protein. Plays a role in ELK1-dependent transcriptional activation in response to activated Ras signaling. Involved in actin polymerization.                                                                                                                                                |
| 121441  | NEDD1              | 1           |                      | Required for mitosis progression. Promotes the nucleation of microtubules from the spindle.                                                                                                                                                                                                         |
| 10298   | PAK4               | 0.79        | Yes                  | Serine-threonine kinase. Involved in cytoskeleton regulation, cell migration, growth, proliferation or cell survival and affects actin cytoskelton reorganization.                                                                                                                                  |
| 51248   | PDZD11             | 1           |                      | Involved in biotin and ion transmembrane transport.                                                                                                                                                                                                                                                 |
| 54477   | PLEKHA5            | 1           |                      | Phosphatidylinositol-3-phosphate and phosphatidylinositol-3,5-bisphosphate binding. Involved in reproductive system and brain development.                                                                                                                                                          |
| 5358    | PLS3               | 0.9         |                      | Actin-bundling protein. Involved in actin and calcium ion binding.                                                                                                                                                                                                                                  |
| 5528    | PPP2R5D            | 0.94        |                      | Implicated in the negative control of cell growth and division.                                                                                                                                                                                                                                     |
| 5537    | PPP6C              | 1           | Yes                  | Catalytic subunit of protein phosphatase 6. Component of a signaling pathway regulating cell cycle progression, mitotic spindle formation and chromosome segregation.                                                                                                                               |
| 22870   | PPP6R1             | 1           | Yes                  | Regulatory subunit of protein phosphatase 6. May function as a scaffolding PP6 subunit.                                                                                                                                                                                                             |
| 9701    | PPP6R2             | 1           |                      | Regulatory subunit of protein phosphatase 6. May function as a scaffolding PP6 subunit.                                                                                                                                                                                                             |
| 55291   | PPP6R3             | 1           |                      | Regulatory subunit of protein phosphatase 6. May function as a scaffolding PP6 subunit.                                                                                                                                                                                                             |
| 220134  | SKA1               | 1           |                      | Component of the SKA1 complex, a microtubule-binding subcomplex of the outer kinetochore that is essential for proper chromosome segregation.                                                                                                                                                       |
| 6729    | SRP54              | 0.99        |                      | Binds to the signal sequence of presecretory protein when they emerge from the ribosomes. RNA and GTP binding                                                                                                                                                                                       |

**Table S3. Functional Annotation of ARHGEF2 interactors.**

Functional annotation was made based on GO analysis and a survey of the literature. Saint score and previously validated interactors are indicated.

| Protein Name                                               | ID (Uniprot) | ANALYSIS OF MARK3/C-TAK1 COMPLEXES |               |                              |   | Control* (*Ave. # of peptides)                                                                                                                                                                                                                              | Comments |
|------------------------------------------------------------|--------------|------------------------------------|---------------|------------------------------|---|-------------------------------------------------------------------------------------------------------------------------------------------------------------------------------------------------------------------------------------------------------------|----------|
|                                                            |              | Gene Name                          | Known Binding | MARK3* (*Ave. # of peptides) |   |                                                                                                                                                                                                                                                             |          |
| MARK3/C-TAK1                                               | P27448       | MARK3                              |               | 358                          | 0 | Member of CAMK Ser/Thr protein kinase family, MARK subfamily. 1 KA1 Domain. 1 UBA Domain                                                                                                                                                                    |          |
| <b>14-3-3 FAMILY MEMBERS</b>                               |              |                                    |               |                              |   |                                                                                                                                                                                                                                                             |          |
| 14-3-3 protein epsilon                                     | P62258       | YWHAE                              | Yes           | 133 (+131)                   | 2 | Belongs to the 14-3-3 family.                                                                                                                                                                                                                               |          |
| 14-3-3 protein zeta/delta                                  | P63104       | YWHAZ                              | Yes           | 72 (+69)                     | 3 | Belongs to the 14-3-3 family.                                                                                                                                                                                                                               |          |
| 14-3-3 protein theta                                       | P27348       | YWHAQ                              | Yes           | 37(+35)                      | 2 | Belongs to the 14-3-3 family.                                                                                                                                                                                                                               |          |
| 14-3-3 protein eta                                         | Q04917       | YWHAH                              | Yes           | 33(+34)                      | 1 | Belongs to the 14-3-3 family.                                                                                                                                                                                                                               |          |
| 14-3-3 protein gamma                                       | P61981       | YWHAG                              | Yes           | 42(+40)                      | 2 | Belongs to the 14-3-3 family.                                                                                                                                                                                                                               |          |
| 14-3-3 protein beta                                        | P31946       | YWHAB                              | Yes           | 60(+51)                      | 9 | Belongs to the 14-3-3 family.                                                                                                                                                                                                                               |          |
| <b>MICROTUBULE-ASSOCIATED</b>                              |              |                                    |               |                              |   |                                                                                                                                                                                                                                                             |          |
| CLIP-associating protein 2                                 | O75122       | CLASP2                             |               | 42                           | 0 | Microtubule plus-end tracking protein that promotes the stabilization of dynamic microtubules. LqRsrSddV                                                                                                                                                    |          |
| CLIP-associating protein 1                                 | Q72460       | CLASP1                             |               | 32                           | 0 | Microtubule plus-end tracking protein that promotes the stabilization of dynamic microtubules. LqRsrSddV                                                                                                                                                    |          |
| GEF-H1, Rho/Rac guanine nucleotide exchange factor 2       | Q92974       | ARHGEF2                            |               | 28                           | 0 | Activates Rho-GTPases by promoting the exchange of GDP for GTP. Localizes to the tips of cortical microtubules of the mitotic spindle during cell division, and is further released upon microtubule depolymerization.                                      |          |
| Cytoskeleton-associated protein 5                          | Q14008       | CKAP5                              |               | 27(+21)                      | 6 | Plays a major role in organizing spindle poles. LaReaStgYL                                                                                                                                                                                                  |          |
| MAP4, Microtubule-associated protein 4 (MAP 4)             | P27816       | MAP4                               | Yes           | 26(+17)                      | 9 | Non-neuronal microtubule-associated protein. Promotes microtubule assembly.                                                                                                                                                                                 |          |
| Kinesin-2                                                  | O00139       | KIF2A                              |               | 13(+10)                      | 3 | Plus end-directed microtubule-dependent motor required for normal brain development. Required for normal progression and spindle dynamics during mitosis.                                                                                                   |          |
| MAP7, Microtubule-associated protein 7                     | Q14244       | MAP7                               |               | 5                            | 0 | Microtubule-stabilizing protein that may play an important role during reorganization of microtubules during polarization and differentiation of epithelial cells.                                                                                          |          |
| Microtubule-actin cross-linking factor 1, isoforms 1/2/3/5 | Q9UPN3       | MACF1                              |               | 2                            | 0 | F-actin-binding protein which may play a role in cross-linking actin to other cytoskeletal proteins. Also binds to microtubules. VeKrrSlel, VqKafSidl                                                                                                       |          |
| Microtubule-associated protein RP/EB family member 3, RP3  | Q9UPY8       | MAPRE3                             |               | 2                            | 0 | May be involved in microtubule polymerization, and spindle function by stabilizing microtubules and anchoring them at centrosomes. May play a role in cell migration                                                                                        |          |
| <b>SIGNALING RELATED</b>                                   |              |                                    |               |                              |   |                                                                                                                                                                                                                                                             |          |
| TBC1 domain family member 4                                | O60343       | TBC1D4                             |               | 30(+29)                      | 1 | May act as a GTPase-activating protein for RAB2A, RAB8A, RAB10 and RAB14.                                                                                                                                                                                   |          |
| SH2 containing inositol-5-phosphatase                      | O00145       | INPP5D                             |               | 10                           | 0 | Phosphatidylinositol (PtdIns) phosphatase that specifically hydrolyzes the 5-phosphate of phosphatidylinositol-3,4,5-trisphosphate (PtdIns(3,4,5)P3) to produce PtdIns(3,4)P2, thereby negatively regulating the PI3K (phosphoinositide 3-kinase) pathways. |          |
| PP2A, subunit A, PR65-alpha isoform                        | P30153       | PPP2R1A                            |               | 9(+8)                        | 1 | Serine/threonine protein phosphatase PP2A scaffolding subunit A                                                                                                                                                                                             |          |
| PP2A, subunit B, B-alpha isoform                           | P63151       | PPP2R2A                            |               | 3                            | 0 | Serine/threonine protein phosphatase PP2A regulatory subunit B family.                                                                                                                                                                                      |          |
| PP2C gamma                                                 | O15355       | PPM1G                              |               | 8(+7)                        | 1 | Serine/threonine protein phosphatase PP2C catalytic subunit                                                                                                                                                                                                 |          |
| PRAS40                                                     | Q96B36       | AKT1S1                             |               | 4                            | 0 | Subunit of TORC1                                                                                                                                                                                                                                            |          |
| Tyrosine-protein phosphatase, non-receptor type 13         | Q12923       | PTPN13                             |               | 3                            | 0 | Tyrosine phosphatase which regulates negatively FAS-induced apoptosis and NGFR-mediated pro-apoptotic signaling. MgRaiStgsL, lIKriScseL, lSkvqStPvnl                                                                                                        |          |
| Tyrosine-protein phosphatase, non-receptor type 14         | Q15678       | PTPN14                             |               | 3                            | 0 | Tyrosine phosphatase                                                                                                                                                                                                                                        |          |

**Table S4. Analysis of MARK3/C-TAK1 complexes.**

Summary of the different interactors found for MARK3. Previously known binding interactors are indicated. Ave.: Average.

| Data Collection Statistics:      |                                  |
|----------------------------------|----------------------------------|
| Space group                      | $P 3_2 2 1$                      |
| Cell dimensions                  |                                  |
| a, b, c (Å)                      | 91.97, 91.97, 83.08              |
| $\alpha, \beta, \gamma$ (°)      | 90, 90, 120                      |
| Resolution (Å)                   | 50–2.00 (2.03–2.00) <sup>a</sup> |
| Rmerge                           | 0.078 (0.348)                    |
| $I/\sigma I$                     | 31.5 (6.6)                       |
| Completeness (%)                 | 100 (100)                        |
| Redundancy                       | 10.8 (9.2)                       |
| Refinement Statistics:           |                                  |
| Rwork                            | 17.4%                            |
| Rfree                            | 21.0%                            |
| No. of Reflections               | 27423                            |
| No. of Reflections used in Rfree | 2010                             |

<sup>a</sup> Values in parentheses are for the highest resolution shell.

**Table S5: Data collection and refinement statistics for DYNLT1:ARHGEF2 chimera (PDB: 5WI4).**
